# Supplementary material
Source: publisher figshare collection journal article supplement (https://acs.figshare.com/ndownloader/files/4506805)
Supplement: Supplementary file 1 [file 4506805]

  
data_cd29189 
  
_audit_creation_method            SHELXL-97 
_chemical_name_systematic 
; 
 ? 
; 
_chemical_name_common             ? 
_chemical_melting_point           ? 
_chemical_formula_moiety          ? 
_chemical_formula_sum 
 'C36 H37 Cl O5' 
_chemical_formula_weight          585.11 
  
loop_ 
 _atom_type_symbol 
 _atom_type_description 
 _atom_type_scat_dispersion_real 
 _atom_type_scat_dispersion_imag 
 _atom_type_scat_source 
 'C'  'C'   0.0033   0.0016 
 'International Tables Vol C Tables 4.2.6.8 and 6.1.1.4' 
 'H'  'H'   0.0000   0.0000 
 'International Tables Vol C Tables 4.2.6.8 and 6.1.1.4' 
 'O'  'O'   0.0106   0.0060 
 'International Tables Vol C Tables 4.2.6.8 and 6.1.1.4' 
 'Cl'  'Cl'   0.1484   0.1585 
 'International Tables Vol C Tables 4.2.6.8 and 6.1.1.4' 
  
_symmetry_cell_setting            Rhombohedral 
_symmetry_space_group_name_H-M    R-3 
  
loop_ 
 _symmetry_equiv_pos_as_xyz 
 'x, y, z' 
 '-y, x-y, z' 
 '-x+y, -x, z' 
 'x+2/3, y+1/3, z+1/3' 
 '-y+2/3, x-y+1/3, z+1/3' 
 '-x+y+2/3, -x+1/3, z+1/3' 
 'x+1/3, y+2/3, z+2/3' 
 '-y+1/3, x-y+2/3, z+2/3' 
 '-x+y+1/3, -x+2/3, z+2/3' 
 '-x, -y, -z' 
 'y, -x+y, -z' 
 'x-y, x, -z' 
 '-x+2/3, -y+1/3, -z+1/3' 
 'y+2/3, -x+y+1/3, -z+1/3' 
 'x-y+2/3, x+1/3, -z+1/3' 
 '-x+1/3, -y+2/3, -z+2/3' 
 'y+1/3, -x+y+2/3, -z+2/3' 
 'x-y+1/3, x+2/3, -z+2/3' 
  
_cell_length_a                    30.1433(15) 
_cell_length_b                    30.1433(15) 
_cell_length_c                    18.809(3) 
_cell_angle_alpha                 90.00 
_cell_angle_beta                  90.00 
_cell_angle_gamma                 120.00 
_cell_volume                      14801(2) 
_cell_formula_units_Z             18 
_cell_measurement_temperature     293(2) 
_cell_measurement_reflns_used     3016 
_cell_measurement_theta_min       4.681 
_cell_measurement_theta_max       38.812 
  
_exptl_crystal_description        prismatic 
_exptl_crystal_colour             yellow 
_exptl_crystal_size_max           0.397 
_exptl_crystal_size_mid           0.369 
_exptl_crystal_size_min           0.203 
_exptl_crystal_density_meas       ? 
_exptl_crystal_density_diffrn     1.182 
_exptl_crystal_density_method     'not measured' 
_exptl_crystal_F_000              5580 
_exptl_absorpt_coefficient_mu     0.155 
_exptl_absorpt_correction_type    empirical 
_exptl_absorpt_correction_T_min   0.70913 
_exptl_absorpt_correction_T_max   1.00000 
_exptl_absorpt_process_details    sadabs 
  
_exptl_special_details 
; 
 ? 
; 
  
_diffrn_ambient_temperature       293(2) 
_diffrn_radiation_wavelength      0.71073 
_diffrn_radiation_type            MoK\a 
_diffrn_radiation_source          'fine-focus sealed tube' 
_diffrn_radiation_monochromator   graphite 
_diffrn_measurement_device_type   'CCD area detector' 
_diffrn_measurement_method        'phi and omega scans' 
_diffrn_detector_area_resol_mean  ? 
_diffrn_standards_number          ? 
_diffrn_standards_interval_count  ? 
_diffrn_standards_interval_time   ? 
_diffrn_standards_decay_%         ? 
_diffrn_reflns_number             26262 
_diffrn_reflns_av_R_equivalents   0.1425 
_diffrn_reflns_av_sigmaI/netI     0.1032 
_diffrn_reflns_limit_h_min        -36 
_diffrn_reflns_limit_h_max        35 
_diffrn_reflns_limit_k_min        -19 
_diffrn_reflns_limit_k_max        36 
_diffrn_reflns_limit_l_min        -22 
_diffrn_reflns_limit_l_max        22 
_diffrn_reflns_theta_min          1.90 
_diffrn_reflns_theta_max          25.49 
_reflns_number_total              6127 
_reflns_number_gt                 2770 
_reflns_threshold_expression      >2sigma(I) 
  
_computing_data_collection        'Bruker SMART' 
_computing_cell_refinement        'Bruker SMART' 
_computing_data_reduction         'Bruker SHELXTL' 
_computing_structure_solution     'SHELXS-97 (Sheldrick, 1990)' 
_computing_structure_refinement   'SHELXL-97 (Sheldrick, 1997)' 
_computing_molecular_graphics     'Bruker SHELXTL' 
_computing_publication_material   'Bruker SHELXTL' 
  
_refine_special_details 
; 
 Refinement of F^2^ against ALL reflections.  The weighted R-factor wR and 
 goodness of fit S are based on F^2^, conventional R-factors R are based 
 on F, with F set to zero for negative F^2^. The threshold expression of 
 F^2^ > 2sigma(F^2^) is used only for calculating R-factors(gt) etc. and is 
 not relevant to the choice of reflections for refinement.  R-factors based 
 on F^2^ are statistically about twice as large as those based on F, and R- 
 factors based on ALL data will be even larger. 
; 
  
_refine_ls_structure_factor_coef  Fsqd 
_refine_ls_matrix_type            full 
_refine_ls_weighting_scheme       calc 
_refine_ls_weighting_details 
 'calc w=1/[\s^2^(Fo^2^)+(0.1657P)^2^+0.0000P] where P=(Fo^2^+2Fc^2^)/3' 
_atom_sites_solution_primary      direct 
_atom_sites_solution_secondary    difmap 
_atom_sites_solution_hydrogens    geom 
_refine_ls_hydrogen_treatment     constr 
_refine_ls_extinction_method      none 
_refine_ls_extinction_coef        ? 
_refine_ls_number_reflns          6127 
_refine_ls_number_parameters      368 
_refine_ls_number_restraints      8 
_refine_ls_R_factor_all           0.1447 
_refine_ls_R_factor_gt            0.0815 
_refine_ls_wR_factor_ref          0.2811 
_refine_ls_wR_factor_gt           0.2467 
_refine_ls_goodness_of_fit_ref    0.917 
_refine_ls_restrained_S_all       0.957 
_refine_ls_shift/su_max           0.000 
_refine_ls_shift/su_mean          0.000 
  
loop_ 
 _atom_site_label 
 _atom_site_type_symbol 
 _atom_site_fract_x 
 _atom_site_fract_y 
 _atom_site_fract_z 
 _atom_site_U_iso_or_equiv 
 _atom_site_adp_type 
 _atom_site_occupancy 
 _atom_site_symmetry_multiplicity 
 _atom_site_calc_flag 
 _atom_site_refinement_flags 
 _atom_site_disorder_assembly 
 _atom_site_disorder_group 
Cl Cl 0.12429(7) 0.10978(5) 0.32412(10) 0.1359(7) Uani 1 1 d . . . 
O1 O 0.32717(11) 0.39705(10) 0.43681(13) 0.0674(8) Uani 1 1 d . . . 
O2 O 0.48820(18) 0.3612(2) 0.3996(3) 0.1351(16) Uani 1 1 d . . . 
H2 H 0.5120 0.3812 0.4248 0.15(8) Uiso 1 1 calc R . . 
O3 O 0.0107(3) 0.1413(3) 0.1499(3) 0.197(2) Uiso 1 1 d D . . 
O4 O -0.0121(4) 0.1629(4) 0.0666(6) 0.215(5) Uiso 1 1 d D . . 
O5 O 0.3333 0.6667 0.2077(15) 0.31(2) Uiso 1 3 d SD . . 
O6 O 1.0000 1.0000 1.0000 0.21(4) Uiso 1 6 d SD . . 
C1 C 0.27451(15) 0.35581(16) 0.4360(2) 0.0645(11) Uani 1 1 d . . . 
C2 C 0.25524(13) 0.33621(14) 0.36018(18) 0.0538(9) Uani 1 1 d . . . 
C3 C 0.26125(13) 0.36470(13) 0.30120(19) 0.0522(9) Uani 1 1 d . . . 
C4 C 0.23653(13) 0.34127(14) 0.23460(18) 0.0501(9) Uani 1 1 d . . . 
H4 H 0.2178 0.3061 0.2271 0.045(9) Uiso 1 1 calc R . . 
C5 C 0.24375(13) 0.37625(14) 0.18483(18) 0.0525(9) Uani 1 1 d . . . 
C6 C 0.27690(14) 0.42707(15) 0.2152(2) 0.0565(10) Uani 1 1 d . . . 
C7 C 0.28829(14) 0.42094(14) 0.2870(2) 0.0558(9) Uani 1 1 d . . . 
C8 C 0.31924(16) 0.46361(16) 0.3263(2) 0.0732(12) Uani 1 1 d . . . 
H8 H 0.3270 0.4603 0.3732 0.075(13) Uiso 1 1 calc R . . 
C9 C 0.33917(17) 0.51202(18) 0.2960(3) 0.0839(14) Uani 1 1 d . . . 
H9 H 0.3592 0.5410 0.3233 0.102(16) Uiso 1 1 calc R . . 
C10 C 0.32959(18) 0.51731(18) 0.2269(3) 0.0851(14) Uani 1 1 d . . . 
H10 H 0.3445 0.5498 0.2069 0.086(14) Uiso 1 1 calc R . . 
C11 C 0.29798(17) 0.47493(17) 0.1858(2) 0.0718(12) Uani 1 1 d . . . 
H11 H 0.2912 0.4790 0.1387 0.061(11) Uiso 1 1 calc R . . 
C12 C 0.22070(14) 0.36486(15) 0.11318(19) 0.0554(9) Uani 1 1 d . . . 
C13 C 0.21776(16) 0.32433(16) 0.0745(2) 0.0694(11) Uani 1 1 d . . . 
H13 H 0.2320 0.3056 0.0930 0.074(13) Uiso 1 1 calc R . . 
C14 C 0.19390(19) 0.3113(2) 0.0089(3) 0.0920(15) Uani 1 1 d . . . 
H14 H 0.1919 0.2839 -0.0166 0.101(16) Uiso 1 1 calc R . . 
C15 C 0.17307(19) 0.3396(2) -0.0183(3) 0.0950(16) Uani 1 1 d . . . 
H15 H 0.1569 0.3312 -0.0623 0.083(13) Uiso 1 1 calc R . . 
C16 C 0.17613(17) 0.3796(2) 0.0190(3) 0.0852(14) Uani 1 1 d . . . 
H16 H 0.1623 0.3985 0.0001 0.080(13) Uiso 1 1 calc R . . 
C17 C 0.19938(15) 0.39224(18) 0.0841(2) 0.0669(11) Uani 1 1 d . . . 
H17 H 0.2009 0.4196 0.1092 0.094(16) Uiso 1 1 calc R . . 
C18 C 0.22271(14) 0.27950(14) 0.35207(17) 0.0520(9) Uani 1 1 d . . . 
C19 C 0.24347(17) 0.24996(17) 0.3317(2) 0.0657(11) Uani 1 1 d . . . 
H19 H 0.2786 0.2656 0.3238 0.065(11) Uiso 1 1 calc R . . 
C20 C 0.2139(2) 0.19811(18) 0.3226(2) 0.0746(12) Uani 1 1 d . . . 
H20 H 0.2285 0.1787 0.3085 0.104(16) Uiso 1 1 calc R . . 
C21 C 0.1628(2) 0.17548(16) 0.3346(2) 0.0765(12) Uani 1 1 d . . . 
C22 C 0.14015(18) 0.20306(17) 0.3547(2) 0.0779(13) Uani 1 1 d . . . 
H22 H 0.1050 0.1871 0.3623 0.087(14) Uiso 1 1 calc R . . 
C23 C 0.17100(15) 0.25560(15) 0.3636(2) 0.0663(11) Uani 1 1 d . . . 
H23 H 0.1563 0.2749 0.3777 0.100(15) Uiso 1 1 calc R . . 
C24 C 0.36589(15) 0.38548(15) 0.4265(2) 0.0600(10) Uani 1 1 d . . . 
C25 C 0.3958(2) 0.3882(2) 0.4821(2) 0.0943(16) Uani 1 1 d . . . 
H25 H 0.3887 0.3957 0.5272 0.107(17) Uiso 1 1 calc R . . 
C26 C 0.4367(2) 0.3801(2) 0.4729(3) 0.1033(18) Uani 1 1 d . . . 
H26 H 0.4569 0.3821 0.5116 0.104(16) Uiso 1 1 calc R . . 
C27 C 0.44730(18) 0.3692(2) 0.4081(3) 0.0872(14) Uani 1 1 d . . . 
C28 C 0.41775(16) 0.36669(16) 0.3508(2) 0.0731(12) Uani 1 1 d . . . 
H28 H 0.4253 0.3595 0.3058 0.102(17) Uiso 1 1 calc R . . 
C29 C 0.37740(16) 0.37474(16) 0.3598(2) 0.0685(11) Uani 1 1 d . . . 
H29 H 0.3575 0.3730 0.3209 0.053(10) Uiso 1 1 calc R . . 
C30 C 0.2697(2) 0.31342(18) 0.4856(2) 0.0816(14) Uani 1 1 d . . . 
H30A H 0.2860 0.2963 0.4642 0.103(17) Uiso 1 1 calc R . . 
H30B H 0.2342 0.2892 0.4935 0.100(16) Uiso 1 1 calc R . . 
H30C H 0.2860 0.3281 0.5301 0.076(12) Uiso 1 1 calc R . . 
C31 C 0.2439(2) 0.3795(2) 0.4657(2) 0.0867(15) Uani 1 1 d . . . 
H31A H 0.2561 0.3927 0.5125 0.102(16) Uiso 1 1 calc R . . 
H31B H 0.2083 0.3538 0.4681 0.118(19) Uiso 1 1 calc R . . 
H31C H 0.2480 0.4068 0.4352 0.085(15) Uiso 1 1 calc R . . 
C32 C 0.0572(4) 0.1673(5) 0.1037(6) 0.213(5) Uiso 1 1 d D . . 
H32A H 0.0670 0.2027 0.0941 0.304 Uiso 1 1 calc R . . 
H32B H 0.0526 0.1493 0.0591 0.304 Uiso 1 1 calc R . . 
C33 C 0.0953(5) 0.1633(6) 0.1516(6) 0.229(6) Uiso 1 1 d D . . 
H33A H 0.0886 0.1679 0.2002 0.318 Uiso 1 1 calc R . . 
H33B H 0.1294 0.1892 0.1390 0.318 Uiso 1 1 calc R . . 
H33C H 0.0920 0.1301 0.1462 0.318 Uiso 1 1 calc R . . 
C34 C -0.0374(6) 0.1292(7) 0.1266(8) 0.207(7) Uiso 1 1 d D . . 
C35 C -0.0741(4) 0.1300(4) 0.1688(5) 0.206(4) Uiso 1 1 d D . . 
H35A H -0.0701 0.1636 0.1680 0.308 Uiso 1 1 calc R . . 
H35B H -0.0705 0.1213 0.2167 0.308 Uiso 1 1 calc R . . 
H35C H -0.1075 0.1056 0.1512 0.308 Uiso 1 1 calc R . . 
C36 C 0.3333 0.6667 0.2902(17) 0.32(2) Uiso 1 3 d SD . . 
C37 C 1.0000 1.0000 0.9209(11) 0.38(5) Uiso 1 3 d SD . . 
  
loop_ 
 _atom_site_aniso_label 
 _atom_site_aniso_U_11 
 _atom_site_aniso_U_22 
 _atom_site_aniso_U_33 
 _atom_site_aniso_U_23 
 _atom_site_aniso_U_13 
 _atom_site_aniso_U_12 
Cl 0.1566(16) 0.0624(9) 0.1857(17) -0.0144(9) -0.0262(12) 0.0524(9) 
O1 0.0687(18) 0.0684(18) 0.0627(17) -0.0053(13) -0.0065(13) 0.0325(15) 
O2 0.101(3) 0.206(5) 0.139(4) 0.036(3) 0.004(3) 0.107(3) 
C1 0.065(3) 0.074(3) 0.055(2) 0.006(2) 0.0053(19) 0.035(2) 
C2 0.050(2) 0.065(2) 0.055(2) 0.0008(19) 0.0051(17) 0.0348(19) 
C3 0.054(2) 0.056(2) 0.054(2) 0.0063(18) 0.0048(17) 0.0334(19) 
C4 0.052(2) 0.049(2) 0.053(2) 0.0035(17) 0.0008(17) 0.0282(18) 
C5 0.048(2) 0.063(2) 0.056(2) 0.0003(18) 0.0062(17) 0.0344(19) 
C6 0.050(2) 0.057(2) 0.064(2) 0.0086(19) 0.0107(18) 0.0275(19) 
C7 0.048(2) 0.056(2) 0.063(2) 0.0017(19) 0.0031(18) 0.0256(19) 
C8 0.070(3) 0.068(3) 0.077(3) 0.001(2) -0.010(2) 0.032(2) 
C9 0.076(3) 0.056(3) 0.103(4) 0.004(3) -0.011(3) 0.021(2) 
C10 0.083(3) 0.057(3) 0.105(4) 0.019(3) 0.011(3) 0.028(3) 
C11 0.080(3) 0.067(3) 0.071(3) 0.018(2) 0.011(2) 0.039(3) 
C12 0.054(2) 0.069(3) 0.049(2) 0.0103(19) 0.0042(17) 0.036(2) 
C13 0.072(3) 0.075(3) 0.066(3) -0.003(2) -0.010(2) 0.040(2) 
C14 0.102(4) 0.094(4) 0.078(3) -0.020(3) -0.022(3) 0.047(3) 
C15 0.080(3) 0.117(4) 0.071(3) 0.000(3) -0.024(3) 0.036(3) 
C16 0.070(3) 0.103(4) 0.087(4) 0.023(3) -0.007(3) 0.047(3) 
C17 0.058(2) 0.081(3) 0.066(3) 0.013(2) 0.002(2) 0.038(2) 
C18 0.061(2) 0.056(2) 0.047(2) 0.0083(17) 0.0034(17) 0.035(2) 
C19 0.067(3) 0.082(3) 0.065(3) 0.011(2) 0.009(2) 0.050(3) 
C20 0.102(4) 0.076(3) 0.072(3) 0.002(2) 0.001(3) 0.065(3) 
C21 0.099(4) 0.057(3) 0.080(3) 0.001(2) -0.010(3) 0.044(3) 
C22 0.066(3) 0.062(3) 0.102(4) 0.002(2) 0.004(2) 0.029(2) 
C23 0.060(3) 0.059(3) 0.088(3) -0.002(2) 0.008(2) 0.036(2) 
C24 0.057(2) 0.067(3) 0.053(2) 0.0071(19) -0.0034(19) 0.030(2) 
C25 0.089(4) 0.140(5) 0.058(3) -0.006(3) -0.013(3) 0.060(3) 
C26 0.088(4) 0.162(6) 0.068(3) 0.012(3) -0.012(3) 0.069(4) 
C27 0.068(3) 0.112(4) 0.088(4) 0.026(3) 0.007(3) 0.050(3) 
C28 0.067(3) 0.079(3) 0.072(3) 0.007(2) 0.006(2) 0.036(2) 
C29 0.060(3) 0.077(3) 0.059(3) 0.005(2) -0.006(2) 0.027(2) 
C30 0.093(4) 0.090(3) 0.050(3) 0.015(2) 0.000(2) 0.037(3) 
C31 0.095(4) 0.114(4) 0.068(3) -0.010(3) 0.008(3) 0.065(4) 
  
_geom_special_details 
; 
 All esds (except the esd in the dihedral angle between two l.s. planes) 
 are estimated using the full covariance matrix.  The cell esds are taken 
 into account individually in the estimation of esds in distances, angles 
 and torsion angles; correlations between esds in cell parameters are only 
 used when they are defined by crystal symmetry.  An approximate (isotropic) 
 treatment of cell esds is used for estimating esds involving l.s. planes. 
; 
  
loop_ 
 _geom_bond_atom_site_label_1 
 _geom_bond_atom_site_label_2 
 _geom_bond_distance 
 _geom_bond_site_symmetry_2 
 _geom_bond_publ_flag 
Cl C21 1.735(4) . ? 
O1 C24 1.389(5) . ? 
O1 C1 1.446(5) . ? 
O2 C27 1.379(6) . ? 
O2 H2 0.8200 . ? 
O3 C34 1.377(13) . ? 
O3 C32 1.497(10) . ? 
O4 C34 1.453(13) . ? 
O5 O5 1.54(6) 13_565 ? 
O5 C36 1.553(19) . ? 
O6 C37 1.49(2) . ? 
O6 C37 1.49(2) 10_777 ? 
C1 C31 1.526(6) . ? 
C1 C30 1.529(6) . ? 
C1 C2 1.543(5) . ? 
C2 C3 1.359(5) . ? 
C2 C18 1.494(5) . ? 
C3 C4 1.448(5) . ? 
C3 C7 1.492(5) . ? 
C4 C5 1.344(5) . ? 
C4 H4 0.9300 . ? 
C5 C6 1.463(5) . ? 
C5 C12 1.476(5) . ? 
C6 C11 1.369(5) . ? 
C6 C7 1.429(5) . ? 
C7 C8 1.367(5) . ? 
C8 C9 1.392(6) . ? 
C8 H8 0.9300 . ? 
C9 C10 1.357(6) . ? 
C9 H9 0.9300 . ? 
C10 C11 1.386(6) . ? 
C10 H10 0.9300 . ? 
C11 H11 0.9300 . ? 
C12 C13 1.386(5) . ? 
C12 C17 1.387(5) . ? 
C13 C14 1.383(6) . ? 
C13 H13 0.9300 . ? 
C14 C15 1.386(7) . ? 
C14 H14 0.9300 . ? 
C15 C16 1.355(7) . ? 
C15 H15 0.9300 . ? 
C16 C17 1.367(6) . ? 
C16 H16 0.9300 . ? 
C17 H17 0.9300 . ? 
C18 C23 1.369(5) . ? 
C18 C19 1.374(5) . ? 
C19 C20 1.369(6) . ? 
C19 H19 0.9300 . ? 
C20 C21 1.356(6) . ? 
C20 H20 0.9300 . ? 
C21 C22 1.366(6) . ? 
C22 C23 1.389(5) . ? 
C22 H22 0.9300 . ? 
C23 H23 0.9300 . ? 
C24 C25 1.358(6) . ? 
C24 C29 1.382(5) . ? 
C25 C26 1.383(7) . ? 
C25 H25 0.9300 . ? 
C26 C27 1.343(7) . ? 
C26 H26 0.9300 . ? 
C27 C28 1.376(6) . ? 
C28 C29 1.364(6) . ? 
C28 H28 0.9300 . ? 
C29 H29 0.9300 . ? 
C30 H30A 0.9600 . ? 
C30 H30B 0.9600 . ? 
C30 H30C 0.9600 . ? 
C31 H31A 0.9600 . ? 
C31 H31B 0.9600 . ? 
C31 H31C 0.9600 . ? 
C32 C33 1.512(12) . ? 
C32 H32A 0.9700 . ? 
C32 H32B 0.9700 . ? 
C33 H33A 0.9600 . ? 
C33 H33B 0.9600 . ? 
C33 H33C 0.9600 . ? 
C34 C35 1.372(13) . ? 
C35 H35A 0.9600 . ? 
C35 H35B 0.9600 . ? 
C35 H35C 0.9600 . ? 
  
loop_ 
 _geom_angle_atom_site_label_1 
 _geom_angle_atom_site_label_2 
 _geom_angle_atom_site_label_3 
 _geom_angle 
 _geom_angle_site_symmetry_1 
 _geom_angle_site_symmetry_3 
 _geom_angle_publ_flag 
C24 O1 C1 118.8(3) . . ? 
C27 O2 H2 109.5 . . ? 
C34 O3 C32 122.7(9) . . ? 
O5 O5 C36 179.995(5) 13_565 . ? 
C37 O6 C37 180.00(3) . 10_777 ? 
O1 C1 C31 104.8(3) . . ? 
O1 C1 C30 108.4(3) . . ? 
C31 C1 C30 110.0(4) . . ? 
O1 C1 C2 112.3(3) . . ? 
C31 C1 C2 108.5(3) . . ? 
C30 C1 C2 112.5(3) . . ? 
C3 C2 C18 116.4(3) . . ? 
C3 C2 C1 127.4(3) . . ? 
C18 C2 C1 116.0(3) . . ? 
C2 C3 C4 121.6(3) . . ? 
C2 C3 C7 133.5(3) . . ? 
C4 C3 C7 104.8(3) . . ? 
C5 C4 C3 112.2(3) . . ? 
C5 C4 H4 123.9 . . ? 
C3 C4 H4 123.9 . . ? 
C4 C5 C6 107.9(3) . . ? 
C4 C5 C12 125.5(3) . . ? 
C6 C5 C12 126.5(3) . . ? 
C11 C6 C7 120.2(4) . . ? 
C11 C6 C5 131.3(4) . . ? 
C7 C6 C5 108.4(3) . . ? 
C8 C7 C6 118.9(4) . . ? 
C8 C7 C3 134.5(4) . . ? 
C6 C7 C3 106.6(3) . . ? 
C7 C8 C9 119.9(4) . . ? 
C7 C8 H8 120.1 . . ? 
C9 C8 H8 120.1 . . ? 
C10 C9 C8 120.6(5) . . ? 
C10 C9 H9 119.7 . . ? 
C8 C9 H9 119.7 . . ? 
C9 C10 C11 121.0(4) . . ? 
C9 C10 H10 119.5 . . ? 
C11 C10 H10 119.5 . . ? 
C6 C11 C10 119.2(4) . . ? 
C6 C11 H11 120.4 . . ? 
C10 C11 H11 120.4 . . ? 
C13 C12 C17 118.2(4) . . ? 
C13 C12 C5 119.9(3) . . ? 
C17 C12 C5 121.8(4) . . ? 
C14 C13 C12 120.9(4) . . ? 
C14 C13 H13 119.6 . . ? 
C12 C13 H13 119.6 . . ? 
C13 C14 C15 119.1(5) . . ? 
C13 C14 H14 120.4 . . ? 
C15 C14 H14 120.4 . . ? 
C16 C15 C14 120.4(5) . . ? 
C16 C15 H15 119.8 . . ? 
C14 C15 H15 119.8 . . ? 
C15 C16 C17 120.6(5) . . ? 
C15 C16 H16 119.7 . . ? 
C17 C16 H16 119.7 . . ? 
C16 C17 C12 120.8(4) . . ? 
C16 C17 H17 119.6 . . ? 
C12 C17 H17 119.6 . . ? 
C23 C18 C19 118.1(4) . . ? 
C23 C18 C2 120.6(3) . . ? 
C19 C18 C2 121.3(3) . . ? 
C20 C19 C18 121.8(4) . . ? 
C20 C19 H19 119.1 . . ? 
C18 C19 H19 119.1 . . ? 
C21 C20 C19 118.8(4) . . ? 
C21 C20 H20 120.6 . . ? 
C19 C20 H20 120.6 . . ? 
C20 C21 C22 121.8(4) . . ? 
C20 C21 Cl 119.9(4) . . ? 
C22 C21 Cl 118.3(4) . . ? 
C21 C22 C23 118.3(4) . . ? 
C21 C22 H22 120.9 . . ? 
C23 C22 H22 120.9 . . ? 
C18 C23 C22 121.2(4) . . ? 
C18 C23 H23 119.4 . . ? 
C22 C23 H23 119.4 . . ? 
C25 C24 C29 118.5(4) . . ? 
C25 C24 O1 119.5(4) . . ? 
C29 C24 O1 121.8(3) . . ? 
C24 C25 C26 121.1(5) . . ? 
C24 C25 H25 119.4 . . ? 
C26 C25 H25 119.4 . . ? 
C27 C26 C25 119.9(5) . . ? 
C27 C26 H26 120.0 . . ? 
C25 C26 H26 120.0 . . ? 
C26 C27 C28 119.9(5) . . ? 
C26 C27 O2 119.4(5) . . ? 
C28 C27 O2 120.7(5) . . ? 
C29 C28 C27 120.2(5) . . ? 
C29 C28 H28 119.9 . . ? 
C27 C28 H28 119.9 . . ? 
C28 C29 C24 120.3(4) . . ? 
C28 C29 H29 119.8 . . ? 
C24 C29 H29 119.8 . . ? 
C1 C30 H30A 109.5 . . ? 
C1 C30 H30B 109.5 . . ? 
H30A C30 H30B 109.5 . . ? 
C1 C30 H30C 109.5 . . ? 
H30A C30 H30C 109.5 . . ? 
H30B C30 H30C 109.5 . . ? 
C1 C31 H31A 109.5 . . ? 
C1 C31 H31B 109.5 . . ? 
H31A C31 H31B 109.5 . . ? 
C1 C31 H31C 109.5 . . ? 
H31A C31 H31C 109.5 . . ? 
H31B C31 H31C 109.5 . . ? 
O3 C32 C33 99.3(10) . . ? 
O3 C32 H32A 111.9 . . ? 
C33 C32 H32A 111.9 . . ? 
O3 C32 H32B 111.9 . . ? 
C33 C32 H32B 111.9 . . ? 
H32A C32 H32B 109.6 . . ? 
C32 C33 H33A 109.5 . . ? 
C32 C33 H33B 109.5 . . ? 
H33A C33 H33B 109.5 . . ? 
C32 C33 H33C 109.5 . . ? 
H33A C33 H33C 109.5 . . ? 
H33B C33 H33C 109.5 . . ? 
C35 C34 O3 124.3(14) . . ? 
C35 C34 O4 125.7(15) . . ? 
O3 C34 O4 87.0(10) . . ? 
C34 C35 H35A 109.5 . . ? 
C34 C35 H35B 109.5 . . ? 
H35A C35 H35B 109.5 . . ? 
C34 C35 H35C 109.5 . . ? 
H35A C35 H35C 109.5 . . ? 
H35B C35 H35C 109.5 . . ? 
  
loop_ 
 _geom_torsion_atom_site_label_1 
 _geom_torsion_atom_site_label_2 
 _geom_torsion_atom_site_label_3 
 _geom_torsion_atom_site_label_4 
 _geom_torsion 
 _geom_torsion_site_symmetry_1 
 _geom_torsion_site_symmetry_2 
 _geom_torsion_site_symmetry_3 
 _geom_torsion_site_symmetry_4 
 _geom_torsion_publ_flag 
C24 O1 C1 C31 167.2(3) . . . . ? 
C24 O1 C1 C30 49.7(4) . . . . ? 
C24 O1 C1 C2 -75.3(4) . . . . ? 
O1 C1 C2 C3 -46.3(5) . . . . ? 
C31 C1 C2 C3 69.1(5) . . . . ? 
C30 C1 C2 C3 -169.0(4) . . . . ? 
O1 C1 C2 C18 139.1(3) . . . . ? 
C31 C1 C2 C18 -105.6(4) . . . . ? 
C30 C1 C2 C18 16.4(5) . . . . ? 
C18 C2 C3 C4 1.2(5) . . . . ? 
C1 C2 C3 C4 -173.4(3) . . . . ? 
C18 C2 C3 C7 177.6(4) . . . . ? 
C1 C2 C3 C7 2.9(6) . . . . ? 
C2 C3 C4 C5 174.6(3) . . . . ? 
C7 C3 C4 C5 -2.7(4) . . . . ? 
C3 C4 C5 C6 2.6(4) . . . . ? 
C3 C4 C5 C12 -175.6(3) . . . . ? 
C4 C5 C6 C11 175.8(4) . . . . ? 
C12 C5 C6 C11 -6.0(6) . . . . ? 
C4 C5 C6 C7 -1.5(4) . . . . ? 
C12 C5 C6 C7 176.7(3) . . . . ? 
C11 C6 C7 C8 1.9(6) . . . . ? 
C5 C6 C7 C8 179.6(3) . . . . ? 
C11 C6 C7 C3 -177.8(3) . . . . ? 
C5 C6 C7 C3 -0.1(4) . . . . ? 
C2 C3 C7 C8 5.2(7) . . . . ? 
C4 C3 C7 C8 -178.0(4) . . . . ? 
C2 C3 C7 C6 -175.2(4) . . . . ? 
C4 C3 C7 C6 1.6(4) . . . . ? 
C6 C7 C8 C9 -0.2(6) . . . . ? 
C3 C7 C8 C9 179.4(4) . . . . ? 
C7 C8 C9 C10 -2.2(7) . . . . ? 
C8 C9 C10 C11 2.9(7) . . . . ? 
C7 C6 C11 C10 -1.3(6) . . . . ? 
C5 C6 C11 C10 -178.4(4) . . . . ? 
C9 C10 C11 C6 -1.1(7) . . . . ? 
C4 C5 C12 C13 -41.3(5) . . . . ? 
C6 C5 C12 C13 140.8(4) . . . . ? 
C4 C5 C12 C17 135.6(4) . . . . ? 
C6 C5 C12 C17 -42.3(5) . . . . ? 
C17 C12 C13 C14 -0.4(6) . . . . ? 
C5 C12 C13 C14 176.6(4) . . . . ? 
C12 C13 C14 C15 0.4(7) . . . . ? 
C13 C14 C15 C16 0.1(8) . . . . ? 
C14 C15 C16 C17 -0.6(8) . . . . ? 
C15 C16 C17 C12 0.5(7) . . . . ? 
C13 C12 C17 C16 -0.1(6) . . . . ? 
C5 C12 C17 C16 -177.0(4) . . . . ? 
C3 C2 C18 C23 -89.5(4) . . . . ? 
C1 C2 C18 C23 85.8(4) . . . . ? 
C3 C2 C18 C19 89.3(4) . . . . ? 
C1 C2 C18 C19 -95.4(4) . . . . ? 
C23 C18 C19 C20 0.3(6) . . . . ? 
C2 C18 C19 C20 -178.6(3) . . . . ? 
C18 C19 C20 C21 -0.4(6) . . . . ? 
C19 C20 C21 C22 0.7(7) . . . . ? 
C19 C20 C21 Cl -179.6(3) . . . . ? 
C20 C21 C22 C23 -0.7(7) . . . . ? 
Cl C21 C22 C23 179.5(3) . . . . ? 
C19 C18 C23 C22 -0.3(6) . . . . ? 
C2 C18 C23 C22 178.6(4) . . . . ? 
C21 C22 C23 C18 0.5(7) . . . . ? 
C1 O1 C24 C25 -107.8(4) . . . . ? 
C1 O1 C24 C29 76.9(4) . . . . ? 
C29 C24 C25 C26 -0.5(7) . . . . ? 
O1 C24 C25 C26 -176.0(5) . . . . ? 
C24 C25 C26 C27 -0.1(9) . . . . ? 
C25 C26 C27 C28 0.7(8) . . . . ? 
C25 C26 C27 O2 180.0(5) . . . . ? 
C26 C27 C28 C29 -0.7(7) . . . . ? 
O2 C27 C28 C29 -179.9(5) . . . . ? 
C27 C28 C29 C24 0.0(6) . . . . ? 
C25 C24 C29 C28 0.6(6) . . . . ? 
O1 C24 C29 C28 175.9(4) . . . . ? 
C34 O3 C32 C33 -171.8(12) . . . . ? 
C32 O3 C34 C35 -146.0(14) . . . . ? 
C32 O3 C34 O4 -13.9(16) . . . . ? 
  
_diffrn_measured_fraction_theta_max    1.000 
_diffrn_reflns_theta_full              25.49 
_diffrn_measured_fraction_theta_full   1.000 
_refine_diff_density_max    0.744 
_refine_diff_density_min   -0.469 
_refine_diff_density_rms    0.063 
  
